# Supplementary material
Source: PubMed Central journal article supplement (PMC9662232)
Supplement: NIHMS1845678-supplement-Supple_CTAT.pdf [file NIHMS1845678-supplement-Supple_CTAT.pdf]

## CTAT methods

Tables for a “Complete, Transparent, Accurate and Timely account” (CTAT) are now mandatory for all revised submissions. The aim is to enhance the reproducibility of methods.

- Only include the parts relevant to your study
- Refer to the CTAT in the main text as ‘Supplementary CTAT Table’
- Do not add subheadings
- Add as many rows as needed to include all information
- Only include one item per row

**If the CTAT form is not relevant to your study, please outline the reasons why:**

|  |
|--|
|  |
|--|

### 1.1 Antibodies

| Name                                                 | Citation | Supplier                   | Cat no.     | Clone no. |
|------------------------------------------------------|----------|----------------------------|-------------|-----------|
| CD40 agonistic antibody                              |          | BioxCel                    | BE0016-2    | FGK4.5    |
| Anti-PD-1                                            |          |                            |             | 29F.1A12  |
| CD8 depleting antibody                               |          | BioxCel                    | BE0061      | 2.43      |
| YAP                                                  |          | Santa Cruz Biotechnology   | Sc-101199   | 63.7      |
| Anti-Cytokeratin 7                                   |          | Abcam                      | Ab181598    | ERP17078  |
| Cytokeratin 19 monoclonal antibody                   |          | Abcam                      | Ab52625     | EP1580Y   |
| b-Actin                                              |          | BioLegend                  | 622101      | Poly6221  |
| Horseradish peroxidase secondary anti-mouse antibody |          | Cell Signalling Technology | 7076S       |           |
| Iba1                                                 |          | Biocare                    | CP 290 A, B | N/A       |
| CD11c                                                |          | Cell Signaling             | 97585       | D1V9Y     |
| CD8a                                                 |          | eBioscience                | 14-0808-82  | 4SM15     |
| PD-1                                                 |          | R&D Systems                | 8986-PD-100 |           |
| PD-L1                                                |          | R&D Systems                | 156-B7      | B7-H1     |
| CD40                                                 |          | abcam                      | Ab47021     | B-B20     |
| Live/dead fixable near-IR                            |          | ThermoFischer              | L34976      |           |
| Anti-CD3 BV605                                       |          | BioLegend                  | 100237      | 17A2      |
| Anti-CD4 FITC                                        |          | BioLegend                  | 100509      | RM4-5     |
| anti-CD8 AF700                                       |          | BioLegend                  | 100729      | 53-6.7    |
| Anti-NK1.1 BV510                                     |          | BioLegend                  | 108737      | PK-136    |

|                               |  |                   |            |             |
|-------------------------------|--|-------------------|------------|-------------|
| Anti-CD69<br>BV421            |  | BioLegend         | 104527     | H1.2F3      |
| Anti-OX40 PE                  |  | BioLegend         | 119409     | OX-86       |
| Anti-CD44<br>PE/Cy7           |  | BioLegend         | 103029     | 1M7         |
| Anti-CD62L<br>PerCP/Cy5       |  | BioLegend         | 104431     | MEL-14      |
| Anti-Tim3<br>BV421            |  | BioLegend         | 119723     | RMT3-23     |
| Anti-CD3<br>PerCP/Cy5.5       |  | BioLegend         | 100217     | 17A2        |
| Anti-CD4<br>PE/Cy7            |  | BioLegend         | 100421     | GK1.5       |
| Anti-PD1 FITC                 |  | BioLegend         | 135213     | 29F.1A12    |
| Anti-LAG3<br>APC              |  | BioLegend         | 125209     | C9B7W       |
| Anti-CD69<br>AF700            |  | BioLegend         | 104539     | H1.2F3      |
| Anti-Foxp3<br>APC             |  | eBioscience       | 17-5773-82 | FJK-16s     |
| Anti-T-bet<br>PE/Cy7          |  | BioLegend         | 644823     | 4B10        |
| Anti-GATA3<br>PerCP/Cy5       |  | BioLegend         | 653811     | 16E10A23    |
| Anti-RORgt PE                 |  | eBioscience       | 12-6988-82 | B20         |
| Anti-CD4<br>AF700             |  | BioLegend         | 100429     | GK1.5       |
| Anti-CD8<br>BV421             |  | BioLegend         | 100737     | 53-6.7      |
| Anti-IFNy APC                 |  | BioLegend         | 505809     | XMG1.2      |
| Anti-CD11b PB                 |  | BioLegend         | 101223     | M1/70       |
| Anti-CD11c<br>BV650           |  | BioLegend         | 117339     | N418        |
| Anti-F4/80 PE                 |  | eBioscience       | 123109     | BM8         |
| Anti-CD40<br>FITC             |  | BioLegend         | 124607     | 3/23        |
| Anti-MHCII(I-A-<br>I-E) BV510 |  | BioLegend         | 107635     | M5/114.15.2 |
| Anti-CD86 APC                 |  | BioLegend         | 105011     | GL-1        |
| Anti-CD107a<br>PE             |  | BD<br>Biosciences | 121611     | 1D4B        |
| Anti-IFNy<br>PE/Cy7           |  | BioLegend         | 505825     | 505825      |

## 1.2 Cell lines

| Name | Citation | Supplier                    | Cat no. | Passage no. | Authentication test method |
|------|----------|-----------------------------|---------|-------------|----------------------------|
| SB1  |          | Yarchoan<br>Lab<br>(JHUSOM) |         |             |                            |

## 1.3 Organisms

Updated version November 2018

| Name                      | Citation | Supplier          | Strain | Sex    | Age     | Overall n number |
|---------------------------|----------|-------------------|--------|--------|---------|------------------|
| C57BL/6 mice              |          | Charles River Lab |        | female | 8 weeks | 72               |
| Batf3 <sup>-/-</sup> mice |          | Jackson Lab       |        |        |         |                  |

#### 1.4 Sequence based reagents

| Name | Sequence | Supplier |
|------|----------|----------|
|      |          |          |

#### 1.5 Biological samples

| Description | Source | Identifier |
|-------------|--------|------------|
|             |        |            |

#### 1.6 Deposited data

| Name of repository | Identifier | Link |
|--------------------|------------|------|
|                    |            |      |

#### 1.7 Software

| Software name                                          | Manufacturer                                                        | Version                  |
|--------------------------------------------------------|---------------------------------------------------------------------|--------------------------|
| GraphPad Prism 8                                       |                                                                     | Version 8.3.0            |
| HALOTM image analysis software                         | Indica Labs, Corales, NM                                            |                          |
| Aperio AT2 digital whole slide scanner                 | Leica Biosystems, Buffalo Grove, IL                                 |                          |
| Pattern recognition image analysis integrated software | Supervised machine learning                                         | Random Forest classifier |
| R Studio                                               | R Foundation for Statistical Computing, Austria, package "survival" | Version 1.2.5            |
| CytoFLEX LX                                            | Beckman Coulter                                                     |                          |
| FlowJo                                                 | TreeStar Inc.                                                       | Version 10.4.2           |
| NanoDrop Spectrophotometer                             | ThermoFischer Scientific                                            |                          |
| ViiATM7 real-time PCR system                           |                                                                     |                          |
| Chemiluminescence reagents                             | Clarity/Clarity Max ECL, BioRad                                     |                          |

#### 1.8 Other (e.g. drugs, proteins, vectors etc.)

|             |                  |  |
|-------------|------------------|--|
| Gemcitabine | NIH Vet Pharmacy |  |
| Cisplatin   | NIH Vet Pharmacy |  |

|                                                       |                                  |  |
|-------------------------------------------------------|----------------------------------|--|
| <b>Chemiluminescence reagents</b>                     | <b>ECL/ECL Plus - BioRad</b>     |  |
| <b>Paraformaldehyde</b>                               | <b>Fischer Scientific</b>        |  |
| <b>Foxp3/transcription factor staining buffer set</b> | <b>eBioscience</b>               |  |
| <b>Halt Protease and Phosphatase Inhibitor</b>        | <b>Thermo Fischer Scientific</b> |  |
| <b>BCA Protein Assay</b>                              | <b>Thermo Fischer Scientific</b> |  |
|                                                       |                                  |  |

**1.9 Please provide the details of the corresponding methods author for the manuscript:**

Tim Greten.  
 Thoracic and GI Malignancy Section, TGMB NIH/NCI/CCR Building 10 Rm 2B28B  
 9000 Rockville Pike, Bethesda MD 20892 USA  
 Telephone: +1 (240) 760 6114  
 E-mail: tim.greten@nih.gov

**2.0 Please confirm for randomised controlled trials all versions of the clinical protocol are included in the submission. These will be published online as supplementary information.**

|  |
|--|
|  |
|--|
